# Supplementary material for: Non-carbonyl Curcuma longa [NCCL] protects the heart from myocardial ischemia/reperfusion injury by reducing endothelial microparticle mediated inflammation in rats
Source: Royal Society of Chemistry journal article supplement (doi:10.1039/c6ra06858h), 2016-01-01
Supplement: c6ra06858h1.pdf [file c6ra06858h1.pdf]

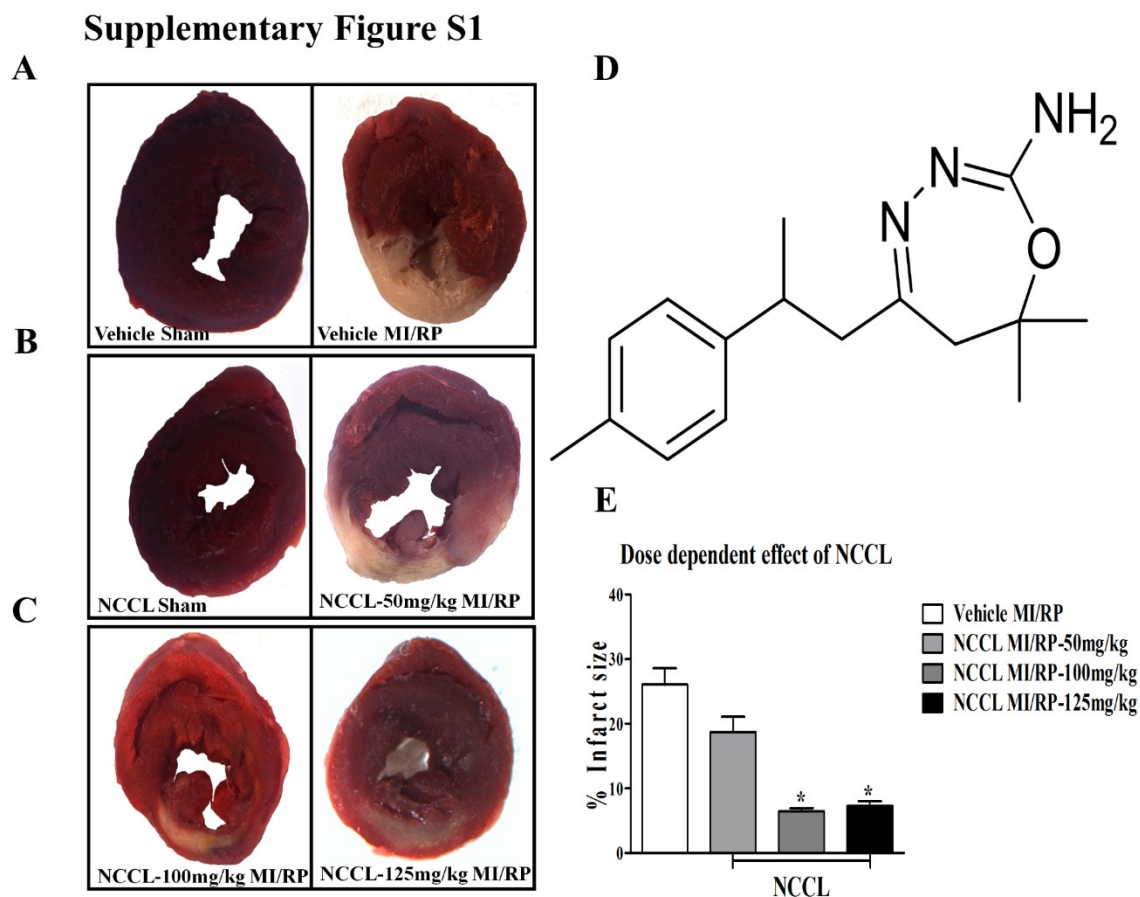

**Caption:**

**Supplementary Figure S1: Dose dependent effect of NCCL.** TTC stained heart section **A**, Vehicle Sham and Vehicle MI/RP; **B**, NCCL Sham and NCCL-50mg/kg MI/RP; **C**, NCCL-100mg/kg and NCCL-125mg/kg. **D**, Marker compound-(I) 7,7-dimethyl-5-(2-p-tolylpropyl)-6,7-dihydro-1,3,4-oxadiazepin-2-amine. **E**, percent infarct size of TTC stained hearts.

## Supplementary Figure S2

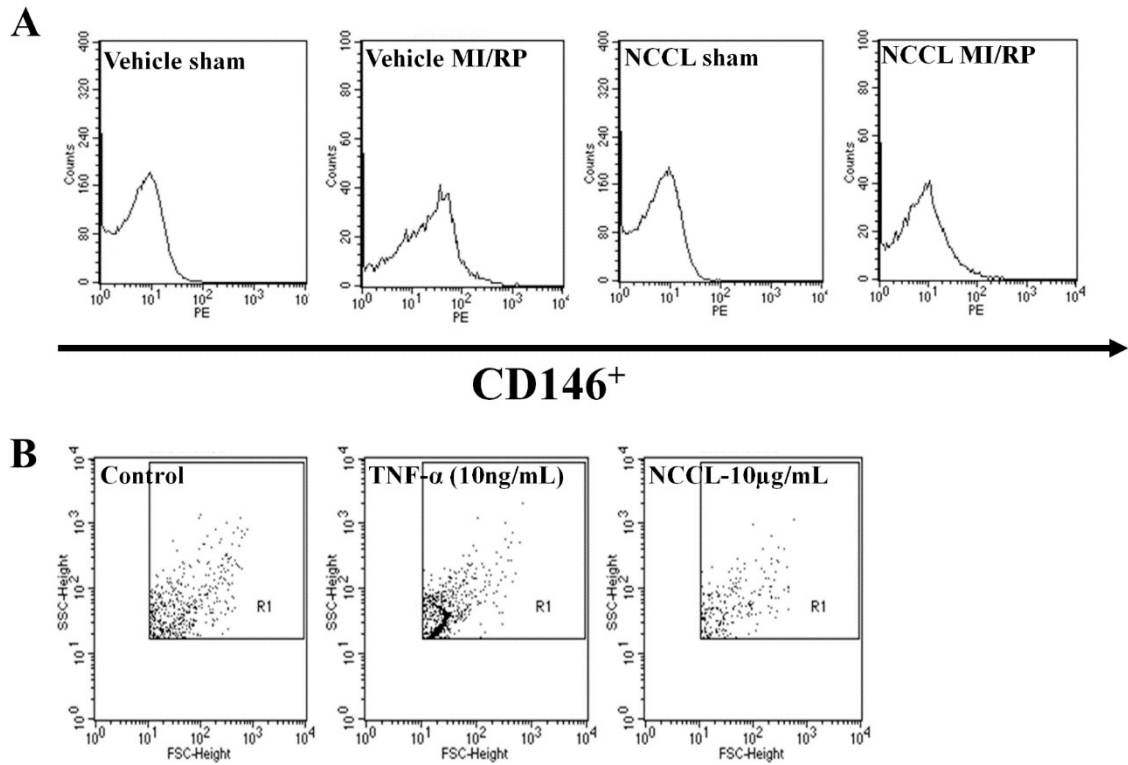

### Caption

**Supplementary Figure S2: Reduced EMP production *in vivo* and *in vitro* after NCCL treatment.** **A**, Histogram of plasma EMPs of Vehicle sham, Vehicle MI/RP, NCCL sham and NCCL MI/RP. **B**, Dot plot of EMPs after TNF $\alpha$  and NCCL treatment.

### Supplementary Figure S3

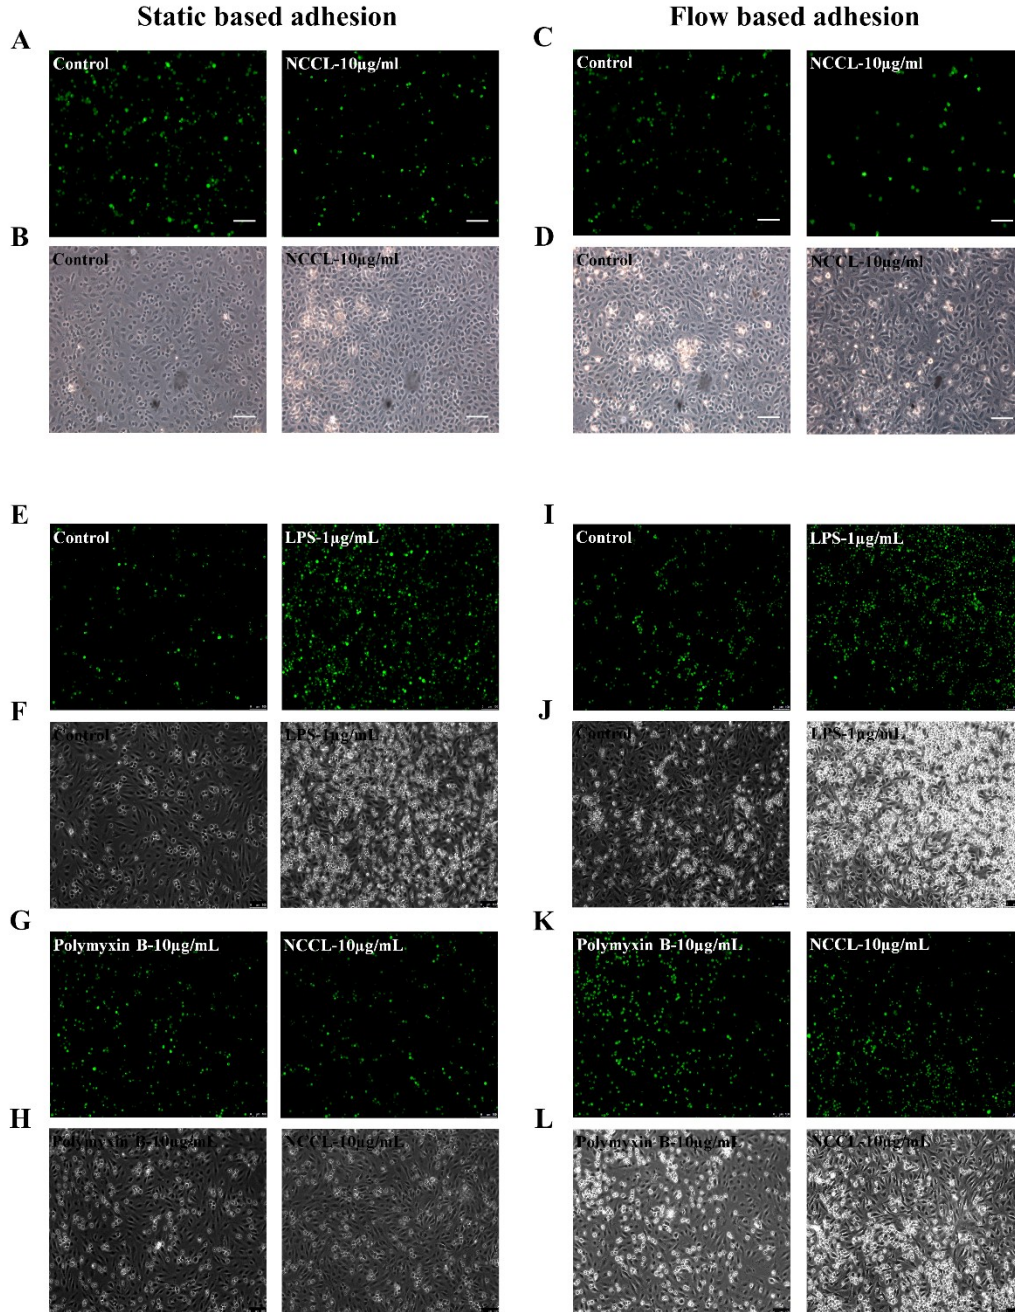

### Caption

**Supplementary Figure S3: Cellular interaction under static and flow based conditions. A, B, E - H, represent adhesion of THP-1 monocytes onto EA.hy926 cells under static condition. C, D, I - L represents adhesion of THP-1 monocytes onto EA.hy926 cells under flow based**

condition. Panel **A, C, E, G, I,** and **K,** represent the fluorescence image of THP-1 monocytes adhered onto EA.hy926 cells and Panel **B, D, F, H, J** and **L,** represents the phase contrast image.

## Supplementary Figure S4

### A $^1\text{H}$ NMR (400 MHz, DMSO-d<sub>6</sub>)

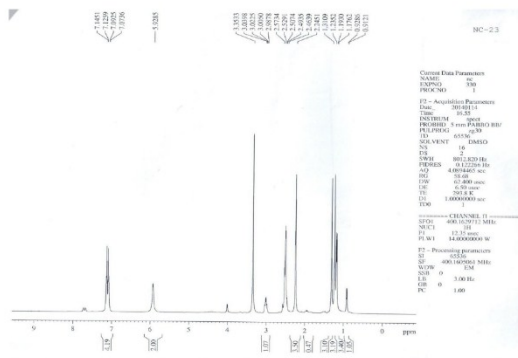

### B $^{13}\text{C}$ NMR (400 MHz, DMSO-d<sub>6</sub>)

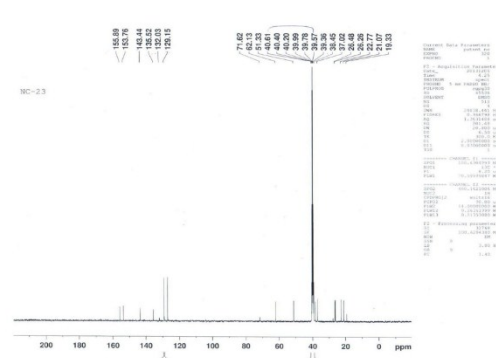

### C HPLC Chromatogram

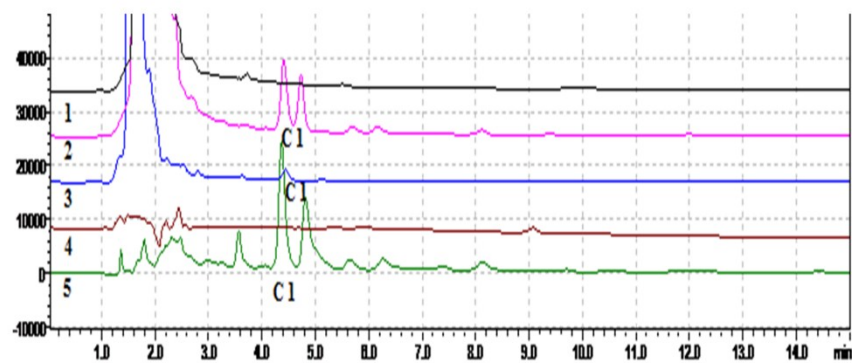

### Caption

**Supplementary Figure S4: NMR and HPLC chromatogram of NCCL. A, represent  $^1\text{H}$  NMR (400 MHz, DMSO-d<sub>6</sub>):  $\delta$  7.13(d, 2H, J= 7.68),  $\delta$  7.08(d, 2H, J= 7.56),  $\delta$  5.93 (S, 2H),  $\delta$  3.01 (dd, 1H, J=6.90),  $\delta$  2.5 (m, 4H),  $\delta$  2.24 (s, 3H) ,  $\delta$  1.31 (s, 3H),  $\delta$  1.23(s, 3H),  $\delta$  1.18 (d, 3H, J=6.72). B, represents  $^{13}\text{C}$  NMR (400 MHz, DMSO-d<sub>6</sub>): 155.41, 153.28, 142.96, 135.04, 128.86, 126.69, 61.66, 50.85, 37.98, 36.55, 26.00, 25.78, 22.29, 20.59. C, represents HPLC fingerprint of NCCL achieved on a Lichrocart RP 18e (250 x 4.6mm, 5 $\mu$ ) column using mobile phase comprising acetonitrile: water (70:30); where C1 represents major marker compound (I); 1: Blank plasma, 2: Plasma spiked with 200  $\mu\text{g/mL}$  NCCL, 3: Plasma at 6 hours after administration of NCCL, 4: Blank methanol, 5: NCCL (200  $\mu\text{g/mL}$ ).**
